# Supplementary material for: Altered NK Cell Receptor Profiles and Immune-Inflammatory Markers in Adolescent Major Depressive Disorder: Associations with Cognitive Impairment
Source: Research Square preprint supplement (doi:10.21203/rs.3.rs-7186161/v1), 2025-08-27
Supplement: Supplementary file 1 [file 841ec4162848fd4e599dd07a.docx]

**Table 1.** Main instruments and experimental reagents.

| **Item** | **Manufacturer** | **Origin** |
| --- | --- | --- |
| **Laboratory Instruments** | | |
| High-speed benchtop centrifuge | Thermo Fisher Scientific | Shanghai, China |
| Vortex mixer | Dragon Laboratory Instruments Co., Ltd. | Beijing, China |
| Flow cytometer (NovoCyte) | Agilent Technologies | USA |
| Medical refrigerator (4℃/–20℃) | Dechi Trading Co., Ltd. | Zhengzhou, China |
| –80℃ ultra-low temperature freezer | Thermo Fisher Scientific | Shanghai, China |
| Inverted microscope | Dilon Optical Instrument Co., Ltd. | Shanghai, China |
| Ice maker | Tianchi Biotechnology Co., Ltd. | Henan, China |
| Water bath | Huafeng Instrument Co., Ltd. | Changzhou, China |
| **Reagents and Antibodies** | | |
| Human TruStain FcX | BioLegend | USA |
| PE anti-human CD45 | BioLegend | USA |
| FITC anti-human CD3 | BioLegend | USA |
| BV421 anti-human CD56 (NCAM) | BioLegend | USA |
| APC anti-human HLA-DR | BioLegend | USA |
| PE anti-human CD159c (NKG2C) | BioLegend | USA |
| APC anti-human CD335 (NKp46) | BioLegend | USA |
| PE anti-human CD337 (NKp30) | BioLegend | USA |
| APC anti-human CD159a (NKG2A) | BioLegend | USA |
| PE anti-human CD158 (KIR2DL1) | BioLegend | USA |
| APC anti-human CD57 | BioLegend | USA |
| PE anti-human CD85j (ILT2) | BioLegend | USA |
| Lymphocyte separation medium | Genepan Biotech Co., Ltd. | Shanghai, China |
| Serum-free cryopreservation medium (CELLSAVING™) | Solarbio Life Sciences | Beijing, China |
| 1×PBS buffer (pH 7.2–7.4) | Solarbio Life Sciences | Beijing, China |

**Table 2.** Blood immune-inflammatory markers of the MDD and HC groups.

| **Variables** | **MDD group (n=52)** | **HC group (n=28)** | ***t/z* value** | ***p* value** |
| --- | --- | --- | --- | --- |
| PLT×10⁹/L, med (IQR) | 246.50(210.38–282.63) | 251.50(220.75–282.25) | -0.928 | 0.353 |
| NEU×10⁹/L, med (IQR) | 2.77(2.07–3.47) | 3.52(2.43–4.61) | -2.14 | 0.032* |
| LYM×10⁹/L, mean (SD) | 2.48±0.71 | 2.00±0.58 | 3.059 | 0.003** |
| MONO×10⁹/L, med (IQR) | 0.45(0.33–0.57) | 0.40(0.33–0.47) | -1.867 | 0.062 |
| NLR, med (IQR) | 1.20(0.87–1.53) | 1.81(1.29–2.32) | -3.742 | <0.001*** |
| MLR, med (IQR) | 0.18(0.15–0.22) | 0.20(0.16–0.25) | -0.620 | 0.535 |
| PLR, med (IQR) | 96.16(73.96–118.37) | 129.37(106.58–152.15) | -3.258 | 0.001*** |
| SII, med (IQR) | 304.48(215.06–393.89) | 430.69(290.41–570.96) | -3.641 | <0.001*** |
| SIRI, med (IQR) | 0.545(0.37–0.72) | 0.64(0.43–0.84) | -1.796 | 0.073 |

Abbreviations: MDD, Major Depressive Disorder; HC, healthy control; IQR, interquartile range; SD, standard deviation; PLT, platelet count; NEU, neutrophil count; LYM, lymphocyte count; MONO, monocyte count; NLR, neutrophil-to-lymphocyte ratio; MLR, monocyte-to-lymphocyte ratio; PLR, platelet-to-lymphocyte ratio; SII, systemic immune-inflammatory index; SIRI, systemic inflammatory response index; *, *p* < 0.05; **, *p* < 0.01; ***, *p* < 0.001.

**Table 3.** NK cell surface receptor expression of the MDD and HC groups.

| **Variables** | **MDD group (n=52)** | **HC group (n=28)** | ***t/z* value** | ***p* value** |
| --- | --- | --- | --- | --- |
| NK cell, med (IQR) (%) | 0.07(0.05–0.10) | 0.11(0.07–0.16) | -2.804 | 0.005** |
| HLA-DR, med (IQR) (%) | 0.11(0.08–0.15) | 0.07(0.05–0.10) | -4.418 | <0.001*** |
| NKG2C, med (IQR) (%) | 0.29(0.16–0.42) | 0.42(0.22–0.63) | -1.437 | 0.141 |
| NKp30, mean (SD) (%) | 0.43±0.11 | 0.44±0.11 | -0.539 | 0.591 |
| NKp46, mean (SD) (%) | 0.13±0.05 | 0.09±0.03 | 4.794 | <0.001*** |
| KIR2DL1, med (IQR) (%) | 0.26(0.12–0.40) | 0.21(0.09–0.33) | -0.752 | 0.452 |
| NKG2A, med (IQR) (%) | 0.21(0.13–0.29) | 0.14(0.10–0.18) | -2.194 | 0.028* |
| CD57, mean (SD) (%) | 0.30±0.11 | 0.38±0.12 | -2.959 | 0.004** |
| ILT2, med (IQR) (%) | 0.13(0.10–0.17) | 0.10(0.07–0.13) | -2.628 | 0.009** |

Abbreviations: MDD, Major Depressive Disorder; HC, healthy control; IQR, interquartile range; SD, standard deviation; HLA-DR, human leukocyte antigen – DR isotype; NKG2C, natural killer group 2 member C; NKp30, natural killer cell p30-related protein; NKp46, natural killer cell p46-related protein; KIR2DL1; killer-cell immunoglobulin-like receptor, 2 domains, long cytoplasmic tail 1; NKG2A, natural killer group 2 member A; CD57, cluster of differentiation 57; ILT2, immunoglobulin-like transcript 2; *, *p* < 0.05; **, *p* < 0.01; ***, *p* < 0.001.

**Table 4.** MCCB scores of the MDD group and the HC group.

| **Variables** | **MDD group (n=52)** | **HC group (n=28)** | ***t/z* value** | ***p* value** |
| --- | --- | --- | --- | --- |
| Speed of processing, mean (SD) | 30.92±10.82 | 39.90±9.53 | -3.681 | <0.001*** |
| Attention/vigilance, mean (SD) | 31.58±11.04 | 35.96±9.52 | -1.776 | 0.080 |
| Working memory, mean (SD) | 38.23±11.63 | 43.18±11.64 | -1.815 | 0.073 |
| Verbal learning, mean (SD) | 36.08±8.99 | 39.18±8.86 | -1.479 | 0.143 |
| Visual learning, med (IQR) | 45.00(37.25–52.75) | 47.50(42.13–52.88) | -1.454 | 0.146 |
| Reasoning and problem solving, med (IQR) | 31.50(22.50–40.5) | 43.50(35.25–51.75) | -3.452 | <0.001*** |
| Social cognition, med (IQR) | 36.00(27.63–44.38) | 41.50(32.25–50.75) | -2.347 | 0.019* |
| Overall composite, mean (SD) | 28.12±10.70 | 37.89±7.96 | -4.241 | <0.001*** |

Abbreviations: MDD, major depressive disorder; HC, healthy control; SD, standard deviation; IQR, interquartile range; MCCB, MATRICS consensus cognitive battery; *, *p* < 0.05; ***, *p* < 0.001, statistically significant.

**Table 5a.** Correlations between Immune-Inflammatory Markers and Cognitive Function in the MDD group.

| **Variables** | | **SoP** | **AV** | **WM** | **Vrbl** | **Vis** | **RPS** | **SC** | **Comp** |
| --- | --- | --- | --- | --- | --- | --- | --- | --- | --- |
| **PLT** | ***ρ*** | 0.071 | -0.081 | -0.208 | -0.238 | -0.215 | 0.022 | 0.018 | -0.099 |
| ***p*** | 0.615 | 0.567 | 0.138 | 0.090 | 0.125 | 0.879 | 0.901 | 0.484 |
| **NEU** | ***ρ*** | -0.020 | -0.028 | -0.217 | -0.063 | -0.058 | 0.106 | 0.174 | -0.020 |
| ***p*** | 0.890 | 0.844 | 0.122 | 0.655 | 0.683 | 0.454 | 0.218 | 0.890 |
| **LYM** | ***ρ*** | -0.106 | -0.005 | 0.094 | 0.031 | -0.073 | 0.177 | -0.045 | -0.006 |
| ***p*** | 0.454 | 0.972 | 0.506 | 0.827 | 0.606 | 0.209 | 0.751 | 0.968 |
| **MONO** | ***ρ*** | -0.133 | 0.052 | -0.135 | -0.209 | -0.223 | -0.076 | -0.028 | -0.171 |
| ***p*** | 0.349 | 0.712 | 0.341 | 0.137 | 0.112 | 0.591 | 0.845 | 0.226 |
| **NLR** | ***ρ*** | 0.054 | -0.013 | -0.170 | -0.010 | -0.005 | -0.023 | 0.173 | 0.031 |
| ***p*** | 0.705 | 0.927 | 0.229 | 0.942 | 0.973 | 0.869 | 0.221 | 0.826 |
| **MLR** | ***ρ*** | -0.067 | 0.072 | -0.251 | -0.191 | -0.121 | -.282* | 0.051 | -0.181 |
| ***p*** | 0.639 | 0.614 | 0.073 | 0.174 | 0.394 | 0.043 | 0.721 | 0.200 |
| **PLR** | ***ρ*** | 0.106 | -0.044 | -0.251 | -0.202 | -0.070 | -0.168 | 0.063 | -0.092 |
| ***p*** | 0.456 | 0.755 | 0.073 | 0.151 | 0.621 | 0.233 | 0.659 | 0.516 |
| **SII** | ***ρ*** | 0.079 | -0.029 | -.318* | -0.141 | -0.089 | 0.002 | 0.120 | -0.043 |
| ***p*** | 0.577 | 0.840 | 0.021 | 0.320 | 0.529 | 0.988 | 0.396 | 0.761 |
| **SIRI** | ***ρ*** | -0.100 | 0.054 | -.292* | -0.172 | -0.160 | -0.112 | 0.119 | -0.143 |
| ***p*** | 0.480 | 0.703 | 0.036 | 0.223 | 0.258 | 0.431 | 0.399 | 0.313 |

Abbreviations: MDD, major depressive disorder; PLT, platelet count; NEU, neutrophil count; LYM, lymphocyte count; MONO, monocyte count; NLR, neutrophil-to-lymphocyte ratio; MLR, monocyte-to-lymphocyte ratio; PLR, platelet-to-lymphocyte ratio; SII, systemic immune-inflammatory index; SIRI, systemic inflammatory response index; SoP, speed of processing; AV, attention/vigilance; WM, working memory; Vrbl, verbal learning; Vis, visual learning; RPS, reasoning and problem solving; SC, social cognition; Comp, overall composite; *, *p* < 0.05.

**Table 5b.** Correlations between Immune-Inflammatory Markers and Cognitive Function in the HC group.

| **Variables** | | **SoP** | **AV** | **WM** | **Vrbl** | **Vis** | **RPS** | **SC** | **Comp** |
| --- | --- | --- | --- | --- | --- | --- | --- | --- | --- |
| **PLT** | ***ρ*** | -0.068 | 0.024 | -0.165 | -0.155 | 0.232 | -0.065 | 0.011 | -0.035 |
| ***p*** | 0.732 | 0.902 | 0.403 | 0.431 | 0.234 | 0.744 | 0.956 | 0.859 |
| **NEU** | ***ρ*** | .407* | .437* | 0.292 | -0.204 | 0.083 | 0.216 | -0.135 | 0.315 |
| ***p*** | 0.032 | 0.020 | 0.131 | 0.298 | 0.674 | 0.271 | 0.493 | 0.103 |
| **LYM** | ***ρ*** | 0.233 | 0.264 | -0.107 | -0.095 | 0.198 | -0.046 | 0.149 | 0.115 |
| ***p*** | 0.233 | 0.174 | 0.587 | 0.631 | 0.313 | 0.818 | 0.448 | 0.561 |
| **MONO** | ***ρ*** | .433* | 0.212 | -0.062 | -0.045 | 0.116 | .417* | -0.041 | 0.240 |
| ***p*** | 0.021 | 0.278 | 0.755 | 0.820 | 0.558 | 0.027 | 0.835 | 0.218 |
| **NLR** | ***ρ*** | 0.315 | 0.222 | 0.332 | -0.015 | -0.048 | 0.191 | -0.134 | 0.275 |
| ***p*** | 0.103 | 0.256 | 0.084 | 0.941 | 0.808 | 0.331 | 0.498 | 0.157 |
| **MLR** | ***ρ*** | 0.260 | 0.024 | 0.016 | 0.104 | -0.110 | 0.342 | -0.100 | 0.137 |
| ***p*** | 0.181 | 0.904 | 0.934 | 0.598 | 0.576 | 0.075 | 0.614 | 0.486 |
| **PLR** | ***ρ*** | -0.160 | -0.189 | -0.098 | 0.042 | 0.064 | -0.077 | 0.013 | -0.084 |
| ***p*** | 0.415 | 0.337 | 0.621 | 0.831 | 0.747 | 0.696 | 0.947 | 0.672 |
| **SII** | ***ρ*** | 0.283 | 0.255 | 0.192 | -0.176 | 0.059 | 0.087 | -0.126 | 0.186 |
| ***p*** | 0.144 | 0.190 | 0.327 | 0.371 | 0.767 | 0.661 | 0.522 | 0.344 |
| **SIRI** | ***ρ*** | .469* | 0.278 | 0.282 | -0.024 | -0.054 | .384* | -0.223 | 0.287 |
| ***p*** | 0.012 | 0.152 | 0.146 | 0.904 | 0.784 | 0.044 | 0.254 | 0.139 |

Abbreviations: HC, healthy control; PLT, platelet count; NEU, neutrophil count; LYM, lymphocyte count; MONO, monocyte count; NLR, neutrophil-to-lymphocyte ratio; MLR, monocyte-to-lymphocyte ratio; PLR, platelet-to-lymphocyte ratio; SII, systemic immune-inflammatory index; SIRI, systemic inflammatory response index; SoP, speed of processing; AV, attention/vigilance; WM, working memory; Vrbl, verbal learning; Vis, visual learning; RPS, reasoning and problem solving; SC, social cognition; Comp, overall composite; *, *p* < 0.05.

**Table 6a.** Correlations between NK Cell Surface Receptors and Cognitive Function in the MDD group.

| **Variables** | | **SoP** | **AV** | **WM** | **Vrbl** | **Vis** | **RPS** | **SC** | **Comp** |
| --- | --- | --- | --- | --- | --- | --- | --- | --- | --- |
| **NK cell** | ***ρ*** | -0.015 | -0.043 | -0.079 | 0.049 | -0.082 | -0.094 | -0.084 | -0.068 |
| ***p*** | 0.919 | 0.760 | 0.576 | 0.728 | 0.565 | 0.509 | 0.552 | 0.633 |
| **HLA-DR** | ***ρ*** | -.346* | -0.269 | -0.040 | -0.247 | -0.144 | -0.156 | -0.049 | -.285* |
| ***p*** | 0.012 | 0.054 | 0.779 | 0.078 | 0.309 | 0.271 | 0.728 | 0.040 |
| **NKG2C** | ***ρ*** | 0.202 | -0.039 | .312* | 0.112 | 0.237 | 0.163 | 0.022 | 0.191 |
| ***p*** | 0.151 | 0.782 | 0.024 | 0.431 | 0.091 | 0.249 | 0.878 | 0.176 |
| **NKp30** | ***ρ*** | 0.166 | .383** | 0.018 | -0.044 | .285* | -0.159 | 0.116 | 0.219 |
| ***p*** | 0.240 | 0.005 | 0.902 | 0.755 | 0.041 | 0.261 | 0.413 | 0.120 |
| **NKp46** | ***ρ*** | -0.096 | 0.028 | -0.171 | -0.140 | 0.062 | -0.003 | -0.007 | -0.044 |
| ***p*** | 0.499 | 0.846 | 0.226 | 0.323 | 0.663 | 0.985 | 0.961 | 0.755 |
| **KIR2DL1** | ***ρ*** | -0.071 | -0.107 | 0.113 | 0.165 | 0.046 | 0.063 | 0.165 | 0.088 |
| ***p*** | 0.616 | 0.450 | 0.423 | 0.242 | 0.747 | 0.657 | 0.244 | 0.533 |
| **NKG2A** | ***ρ*** | 0.014 | 0.012 | -0.094 | -0.136 | -0.067 | -0.070 | 0.076 | -0.054 |
| ***p*** | 0.923 | 0.935 | 0.507 | 0.337 | 0.638 | 0.621 | 0.592 | 0.705 |
| **CD57** | ***ρ*** | 0.148 | 0.065 | 0.198 | 0.169 | .305* | 0.145 | 0.050 | 0.210 |
| ***p*** | 0.295 | 0.648 | 0.159 | 0.231 | 0.028 | 0.305 | 0.723 | 0.135 |
| **ILT2** | ***ρ*** | -0.176 | -0.030 | 0.057 | 0.080 | -0.067 | -0.174 | -0.167 | -0.109 |
| ***p*** | 0.211 | 0.833 | 0.690 | 0.572 | 0.635 | 0.217 | 0.236 | 0.443 |

Abbreviations: MDD, major depressive disorder; SoP, speed of processing; AV, attention/vigilance; WM, working memory; Vrbl, verbal learning; Vis, visual learning; RPS, reasoning and problem solving; SC, social cognition; Comp, overall composite; *, *p* < 0.05; **, *p* < 0.01.

**Table 6b.** Correlations between NK Cell Surface Receptors and Cognitive Function in the HC group.

| **Variables** | | **SoP** | **AV** | **WM** | **Vrbl** | **Vis** | **RPS** | **SC** | **Comp** |
| --- | --- | --- | --- | --- | --- | --- | --- | --- | --- |
| **NK cell** | ***ρ*** | -0.059 | 0.142 | -0.238 | -0.138 | -0.052 | -0.225 | 0.059 | -0.102 |
| ***p*** | 0.765 | 0.471 | 0.223 | 0.484 | 0.794 | 0.249 | 0.767 | 0.605 |
| **HLA-DR** | ***ρ*** | 0.048 | -0.008 | -0.144 | -0.259 | -0.192 | 0.254 | -0.026 | -0.056 |
| ***p*** | 0.808 | 0.968 | 0.465 | 0.184 | 0.329 | 0.191 | 0.896 | 0.776 |
| **NKG2C** | ***ρ*** | -0.285 | 0.047 | -0.345 | -0.214 | -0.311 | -0.248 | 0.177 | -0.229 |
| ***p*** | 0.142 | 0.812 | 0.072 | 0.273 | 0.107 | 0.203 | 0.369 | 0.241 |
| **NKp30** | ***ρ*** | 0.049 | 0.079 | -0.203 | 0.177 | 0.164 | -0.220 | -0.080 | -0.015 |
| ***p*** | 0.805 | 0.691 | 0.301 | 0.368 | 0.405 | 0.261 | 0.684 | 0.938 |
| **NKp46** | ***ρ*** | 0.169 | -0.029 | -0.078 | 0.140 | 0.212 | 0.166 | -0.221 | 0.065 |
| ***p*** | 0.390 | 0.884 | 0.692 | 0.478 | 0.280 | 0.399 | 0.259 | 0.744 |
| **KIR2DL1** | ***ρ*** | -0.120 | -0.030 | -0.160 | -0.166 | 0.046 | -0.294 | 0.015 | -0.129 |
| ***p*** | 0.542 | 0.880 | 0.416 | 0.398 | 0.816 | 0.129 | 0.940 | 0.514 |
| **NKG2A** | ***ρ*** | 0.047 | -0.059 | -0.323 | 0.055 | 0.152 | -0.121 | 0.002 | -0.087 |
| ***p*** | 0.812 | 0.765 | 0.093 | 0.782 | 0.439 | 0.541 | 0.993 | 0.662 |
| **CD57** | ***ρ*** | -0.220 | -0.301 | 0.018 | -0.372 | -0.123 | -0.216 | -0.131 | -0.276 |
| ***p*** | 0.261 | 0.120 | 0.926 | 0.051 | 0.533 | 0.270 | 0.508 | 0.155 |
| **ILT2** | ***ρ*** | -.460* | -.398* | -0.076 | -0.172 | -0.258 | -0.125 | .430* | -0.226 |
| ***p*** | 0.014 | 0.036 | 0.702 | 0.381 | 0.185 | 0.527 | 0.022 | 0.247 |

Abbreviations: HC, healthy control; SoP, speed of processing; AV, attention/vigilance; WM, working memory; Vrbl, verbal learning; Vis, visual learning; RPS, reasoning and problem solving; SC, social cognition; Comp, overall composite; *, *p* < 0.05.

**Table 7a.** Correlations between NK Cell Surface Receptors and Immune-Inflammatory Markers in the MDD group.

| **Variables** | | **PLT** | **NEU** | **LYM** | **MONO** | **NLR** | **MLR** | **PLR** | **SII** | **SIRI** |
| --- | --- | --- | --- | --- | --- | --- | --- | --- | --- | --- |
| **NK cell** | ***ρ*** | 0.120 | 0.185 | 0.017 | 0.005 | 0.131 | -0.049 | 0.026 | 0.213 | 0.087 |
| ***p*** | 0.398 | 0.190 | 0.906 | 0.974 | 0.355 | 0.728 | 0.854 | 0.129 | 0.541 |
| **HLA-DR** | ***ρ*** | 0.025 | 0.058 | 0.134 | 0.185 | -0.047 | 0.047 | -0.070 | -0.049 | 0.078 |
| ***p*** | 0.858 | 0.683 | 0.342 | 0.189 | 0.741 | 0.739 | 0.624 | 0.730 | 0.582 |
| **NKG2C** | ***ρ*** | 0.121 | 0.169 | 0.243 | 0.127 | -0.024 | -0.054 | -0.191 | -0.004 | 0.075 |
| ***p*** | 0.393 | 0.231 | 0.082 | 0.369 | 0.866 | 0.702 | 0.175 | 0.980 | 0.599 |
| **NKp30** | ***ρ*** | -0.020 | -0.108 | -0.204 | -0.055 | 0.047 | 0.061 | 0.156 | 0.029 | -0.049 |
| ***p*** | 0.888 | 0.447 | 0.147 | 0.699 | 0.740 | 0.666 | 0.270 | 0.840 | 0.729 |
| **NKp46** | ***ρ*** | 0.097 | 0.022 | -.289* | -0.114 | 0.200 | 0.063 | .304* | 0.222 | 0.058 |
| ***p*** | 0.494 | 0.877 | 0.038 | 0.420 | 0.156 | 0.658 | 0.028 | 0.114 | 0.682 |
| **KIR2DL1** | ***ρ*** | -0.104 | 0.062 | -0.102 | 0.060 | 0.112 | 0.072 | -0.072 | -0.019 | 0.067 |
| ***p*** | 0.462 | 0.663 | 0.471 | 0.671 | 0.431 | 0.614 | 0.612 | 0.891 | 0.635 |
| **NKG2A** | ***ρ*** | -0.042 | -0.036 | -.275* | 0.043 | 0.194 | 0.190 | 0.272 | 0.164 | 0.106 |
| ***p*** | 0.768 | 0.801 | 0.048 | 0.764 | 0.167 | 0.177 | 0.051 | 0.246 | 0.454 |
| **CD57** | ***ρ*** | -0.062 | 0.041 | 0.153 | -0.146 | -0.137 | -0.186 | -0.127 | -0.111 | -0.154 |
| ***p*** | 0.663 | 0.774 | 0.279 | 0.302 | 0.334 | 0.187 | 0.371 | 0.433 | 0.277 |
| **ILT2** | ***ρ*** | -0.226 | -0.219 | -0.138 | -0.096 | -0.096 | 0.015 | -0.028 | -0.212 | -0.147 |
| ***p*** | 0.108 | 0.119 | 0.331 | 0.497 | 0.498 | 0.918 | 0.845 | 0.131 | 0.297 |

Abbreviations: MDD, major depressive disorder; PLT, platelet count; NEU, neutrophil count; LYM, lymphocyte count; MONO, monocyte count; NLR, neutrophil-to-lymphocyte ratio; MLR, monocyte-to-lymphocyte ratio; PLR, platelet-to-lymphocyte ratio; SII, systemic immune-inflammatory index; SIRI, systemic inflammatory response index; *, *p* < 0.05.

**Table 7b.** Correlations between NK Cell Surface Receptors and Immune-Inflammatory Markers in the HC group.

| **Variables** | | **PLT** | **NEU** | **LYM** | **MONO** | **NLR** | **MLR** | **PLR** | **SII** | **SIRI** |
| --- | --- | --- | --- | --- | --- | --- | --- | --- | --- | --- |
| **NK cell** | ***ρ*** | 0.134 | 0.040 | 0.082 | 0.045 | -0.007 | -0.109 | 0.055 | 0.040 | -0.009 |
| ***p*** | 0.497 | 0.841 | 0.677 | 0.821 | 0.971 | 0.582 | 0.781 | 0.839 | 0.964 |
| **HLA-DR** | ***ρ*** | -0.120 | -0.074 | 0.177 | 0.050 | -0.281 | -0.145 | -0.265 | -0.256 | -0.218 |
| ***p*** | 0.544 | 0.706 | 0.367 | 0.799 | 0.147 | 0.461 | 0.173 | 0.189 | 0.264 |
| **NKG2C** | ***ρ*** | 0.299 | 0.023 | 0.026 | 0.101 | -0.101 | -0.071 | 0.099 | 0.014 | -0.074 |
| ***p*** | 0.122 | 0.908 | 0.896 | 0.608 | 0.609 | 0.719 | 0.615 | 0.945 | 0.710 |
| **NKp30** | ***ρ*** | -0.317 | -0.249 | 0.072 | -0.252 | -0.257 | -0.193 | -0.159 | -0.282 | -0.299 |
| ***p*** | 0.100 | 0.202 | 0.718 | 0.196 | 0.187 | 0.326 | 0.418 | 0.146 | 0.122 |
| **NKp46** | ***ρ*** | 0.125 | 0.043 | -0.182 | 0.054 | 0.237 | 0.202 | 0.362 | 0.158 | 0.213 |
| ***p*** | 0.526 | 0.829 | 0.354 | 0.786 | 0.225 | 0.303 | 0.059 | 0.421 | 0.276 |
| **KIR2DL1** | ***ρ*** | 0.306 | 0.048 | 0.124 | -0.140 | 0.019 | -0.120 | 0.098 | 0.216 | -0.041 |
| ***p*** | 0.113 | 0.808 | 0.530 | 0.478 | 0.925 | 0.543 | 0.620 | 0.269 | 0.836 |
| **NKG2A** | ***ρ*** | -0.025 | -0.107 | 0.108 | -0.184 | -0.190 | -0.224 | -0.077 | -0.119 | -0.225 |
| ***p*** | 0.898 | 0.588 | 0.584 | 0.348 | 0.333 | 0.252 | 0.695 | 0.546 | 0.250 |
| **CD57** | ***ρ*** | -0.316 | -0.296 | -0.268 | -0.315 | -0.082 | -0.062 | 0.070 | -0.229 | -0.236 |
| ***p*** | 0.101 | 0.126 | 0.169 | 0.103 | 0.677 | 0.753 | 0.725 | 0.242 | 0.227 |
| **ILT2** | ***ρ*** | -0.268 | -.402* | -0.066 | -0.374 | -0.296 | -0.229 | -0.099 | -.381* | -.459* |
| ***p*** | 0.168 | 0.034 | 0.739 | 0.050 | 0.126 | 0.242 | 0.616 | 0.045 | 0.014 |

Abbreviations: HC, healthy control; PLT, platelet count; NEU, neutrophil count; LYM, lymphocyte count; MONO, monocyte count; NLR, neutrophil-to-lymphocyte ratio; MLR, monocyte-to-lymphocyte ratio; PLR, platelet-to-lymphocyte ratio; SII, systemic immune-inflammatory index; SIRI, systemic inflammatory response index; *, *p* < 0.05.

**Table 8.** Multiple linear regression results for the prediction of cognitive domain scores by immune-inflammatory and NK cell markers.

| **MCCB Domain** | **F value** | **Degree of freedom** | **Adjusted R²** | ***p* value** |
| --- | --- | --- | --- | --- |
| **MDD group** | | | | |
| Speed of processing | 1.002 | 26,25 | 0.001 | 0.499 |
| Attention/vigilance | 1.222 | 26,25 | 0.102 | 0.309 |
| Working memory | 0.848 | 26,25 | -0.084 | 0.660 |
| Verbal learning | 0.458 | 26,25 | -0.382 | 0.974 |
| Visual learning | 0.995 | 26,25 | -0.003 | 0.506 |
| Reasoning and problem solving | 1.155 | 26,25 | 0.073 | 0.361 |
| Social cognition | 1.109 | 26,25 | 0.053 | 0.399 |
| Overall composite | 0.863 | 26,25 | -0.075 | 0.644 |
| **HC group** | | | | |
| Speed of processing | 0.984 | 23,4 | -0.014 | 0.580 |
| Attention/vigilance | 2.277 | 23,4 | 0.521 | 0.221 |
| Working memory | 1.332 | 23,4 | 0.220 | 0.432 |
| Verbal learning | 1.086 | 23,4 | 0.068 | 0.531 |
| Visual learning | 0.565 | 23,4 | -0.589 | 0.831 |
| Reasoning and problem solving | 0.880 | 23,4 | -0.114 | 0.636 |
| Social cognition | 0.237 | 23,4 | -1.857 | 0.990 |
| Overall composite | 0.799 | 23,4 | -0.207 | 0.683 |

Note: Multiple linear regression models were conducted for each of the seven MCCB cognitive domains, with selected immune-inflammatory markers and NK cell receptors as predictors, adjusting for demographic variables (e.g., age, gender, BMI). The table reports F-values, degrees of freedom, adjusted R², and model-level p-values. None of the models were statistically significant (all p > 0.05).
